# Supplementary material for: Feasibility of a Peer-Led Leisure Time Physical Activity Program for Manual Wheelchair Users Delivered Using a Smartphone
Source: MDPI journal article supplement (doi:10.3390/disabilities4010012), 2024-03-07
Supplement: s1 [file s1]

**Table S1:** ALLWheel peer-trainer checklist to ensure program components were followed.

[illegible]

|                                                      |                                                                                   |                           |          |          |          |          |          |          |          |          |           |           |           |           |           |
|------------------------------------------------------|-----------------------------------------------------------------------------------|---------------------------|----------|----------|----------|----------|----------|----------|----------|----------|-----------|-----------|-----------|-----------|-----------|
| <b>O</b>                                             | Reinterpretation of physiological symptoms when faced with challenging situations |                           |          |          |          |          |          |          |          |          |           |           |           |           |           |
| <b>P*</b>                                            | Help to clarify outcome expectations                                              |                           |          |          |          |          |          |          |          |          |           |           |           |           |           |
| <b>ALLWHEEL program component checklist</b>          |                                                                                   | <b>ALLWHEEL session #</b> |          |          |          |          |          |          |          |          |           |           |           |           |           |
|                                                      |                                                                                   | Week 1                    |          | Week 2   |          | Week 3   |          | W 4      | W 5      | W 6      | W 7       | W 8       | W 9       | Week 10   |           |
|                                                      |                                                                                   | <b>1</b>                  | <b>2</b> | <b>3</b> | <b>4</b> | <b>5</b> | <b>6</b> | <b>7</b> | <b>8</b> | <b>9</b> | <b>10</b> | <b>11</b> | <b>12</b> | <b>13</b> | <b>14</b> |
| <b>Q</b>                                             | Determine PA skills & WC skills that are required (Enactive Mastery)              |                           |          |          |          |          |          |          |          |          |           |           |           |           |           |
| <b>R</b>                                             | Suggestions for skills training                                                   |                           |          |          |          |          |          |          |          |          |           |           |           |           |           |
| <b>S</b>                                             | Focus on past success                                                             |                           |          |          |          |          |          |          |          |          |           |           |           |           |           |
| <b>T</b>                                             | Verbal persuasion about past capabilities                                         |                           |          |          |          |          |          |          |          |          |           |           |           |           |           |
| <b>U</b>                                             | Share experiences of successes (vicarious experience)                             |                           |          |          |          |          |          |          |          |          |           |           |           |           |           |
| <b>V</b>                                             | Identify discrepancies between current behaviour and goals                        |                           |          |          |          |          |          |          |          |          |           |           |           |           |           |
| <b>W*</b>                                            | Review PA goals                                                                   |                           |          |          |          |          |          |          |          |          |           |           |           |           |           |
| <b>X</b>                                             | General and practical social support                                              |                           |          |          |          |          |          |          |          |          |           |           |           |           |           |
| <b>TOTAL TIME TO COMPLETE EACH SESSION (minutes)</b> |                                                                                   |                           |          |          |          |          |          |          |          |          |           |           |           |           |           |

\* Indicates that content is covered by using the ALLWHEEL facilitator manual

For each session, mark each component that you did complete with '✓'

Mark each component that you did not complete with 'X'

### Comments:

Indicate for which ALLWHEEL component and Session # your comment pertains to using the corresponding Letter and Number (e.g.. To comment about 'Action Planning' during Session #6; use L6 as a reference)

|           |                                                                  | <b>Suggestions on how to achieve each ALLWHEEL program component.</b><br><b>** If you use other methods, please share with us</b><br><b>**Call the Research Coordinator if you need clarification on any items.</b>                            |
|-----------|------------------------------------------------------------------|------------------------------------------------------------------------------------------------------------------------------------------------------------------------------------------------------------------------------------------------|
| <b>A</b>  | Act in a warm and caring way/ avoid judgement                    | 1. Listen to the participant, don't disagree or tell the participant they are wrong to feel that way; use agreeable words/gestures.                                                                                                            |
| <b>B</b>  | Express empathy                                                  | 1. Try to imagine how the participants may be feeling; 2. Share similar feelings you may have had in the past;                                                                                                                                 |
| <b>C</b>  | Normalize feelings, behaviours, experiences (social comparisons) | 1. Explain how you might have felt similarly; 2. Validate their feelings by saying that many people can feel that way or have similar experiences; 3. Make sure the participant knows they are not the only one experiencing/feeling that way. |
| <b>D</b>  | Acknowledge & support subject's feelings and perspectives        | 1. Acknowledge feelings, don't dismiss them; 2. Ask why people may be feeling that way; 3. Express your support and understanding                                                                                                              |
| <b>E*</b> | Values interview and self-identity                               | ALLWHEEL manual – session 1. 1. Be engaged in the conversation; 2. Listen to the participant; 3. Ask about previous successes; 4. Ask about current perceived barriers; 5. Repeat some comments back to the                                    |

|    |                                                                |                                                                                                                                                                                                                                                                                                                                                                                                                                                                                                                                                                                                                                     |
|----|----------------------------------------------------------------|-------------------------------------------------------------------------------------------------------------------------------------------------------------------------------------------------------------------------------------------------------------------------------------------------------------------------------------------------------------------------------------------------------------------------------------------------------------------------------------------------------------------------------------------------------------------------------------------------------------------------------------|
|    |                                                                | participants to make them understand that you are listening; 6. If you don't understand what the participant means, ask them if they can explain in another way                                                                                                                                                                                                                                                                                                                                                                                                                                                                     |
| F  | Maximize subject's choices                                     | 1. Come up with as many options as possible for the participants to be physically active; 2.                                                                                                                                                                                                                                                                                                                                                                                                                                                                                                                                        |
| G  | Provide rationale for suggestions                              | 1. Explain to participants why you suggested a particular activity (i.e., is it something you enjoy? Something you have heard that other people enjoy? Easily accessible in the community? Low-cost or free?                                                                                                                                                                                                                                                                                                                                                                                                                        |
| H  | Allow subject to express pros and cons                         | 1. ask participants what they think the pros and cons are                                                                                                                                                                                                                                                                                                                                                                                                                                                                                                                                                                           |
|    |                                                                |                                                                                                                                                                                                                                                                                                                                                                                                                                                                                                                                                                                                                                     |
| I  | Tailor advice and support to the individual                    | 1. consider diagnoses; 2. Consider likes and dislikes; 3. Consider indoor and outdoor activities; 4. Consider the person's wheelchair skills and the skills they may need to accomplish the goal.                                                                                                                                                                                                                                                                                                                                                                                                                                   |
| J  | Self-monitoring of behaviour                                   | 1. Encourage participants to track their PA in their participant manual; 2. Encourage participants to monitor their own goal progression;                                                                                                                                                                                                                                                                                                                                                                                                                                                                                           |
| K* | Involve the participant in Problem solving & coping strategies | <p>ALLWHEEL manual – 1. Identifying potential barriers to PA and creating a plan to overcome the barriers; 2. Discussing with participants what they can do to keep on track; 3. Find out what is motivating for the participant.</p> <p>Coping strategies</p> <ul style="list-style-type: none"> <li>• <b>Be positive!</b> Look at each obstacle you encounter as a learning experience (e.g. you may not have achieved your goal this week, but that can be motivation to reach it next week)</li> <li>• <b>Take an objective view of your goal</b> (e.g. is going for a walk with friend preparing really that hard?)</li> </ul> |

|    |                                                                                   |                                                                                                                                                                                                                                                                                                                                                                                                                                                                                                                                                                                                                                                                                                                                                                                          |
|----|-----------------------------------------------------------------------------------|------------------------------------------------------------------------------------------------------------------------------------------------------------------------------------------------------------------------------------------------------------------------------------------------------------------------------------------------------------------------------------------------------------------------------------------------------------------------------------------------------------------------------------------------------------------------------------------------------------------------------------------------------------------------------------------------------------------------------------------------------------------------------------------|
|    |                                                                                   | <ul style="list-style-type: none"> <li>• <b>Communicate!</b> Don't ruminate or bottle up your emotions, share them with your peer trainer.</li> <li>• <b>Accept yourself (and others).</b> No one is perfect and there is always room for mistakes.</li> <li>• <b>Make connections with people.</b> Social support is key! Visit the Facebook page, call a friend.</li> <li>• <b>Deal effectively with mistakes.</b> i.e. Learn from your mistakes and apply them to future decision making.</li> <li>• <b>Deal effectively with successes also!</b></li> <li>• <b>Develop self-discipline and control.</b> Train yourself to work out three times a week to achieve your goals.</li> </ul> <p><b>Maintenance!</b> Practice, practice, practice for a long life of resilient living!</p> |
| L* | Action planning                                                                   | ALLWHEEL manual – 1. Setting SMART goals; 2. Monitoring goals progression; 4. Use imagery techniques (have the participant explain what it might look like to participate in a chosen activity)                                                                                                                                                                                                                                                                                                                                                                                                                                                                                                                                                                                          |
| M  | Provide positive feedback on PA behaviour                                         | 1. Acknowledging every accomplishment;                                                                                                                                                                                                                                                                                                                                                                                                                                                                                                                                                                                                                                                                                                                                                   |
| N* | Assist in SMART goal-setting                                                      | ALLWHEEL manual – 1. Help participants set realistic goals that can be achieved; 2. Shift the focus to PA, and not to exercise                                                                                                                                                                                                                                                                                                                                                                                                                                                                                                                                                                                                                                                           |
| O  | Reinterpretation of physiological symptoms when faced with challenging situations | 1. When faced with challenging situations, heart rate increases, mouth gets dry, palms get sweaty... let participants know that this is a natural physiological response and that everybody experiences it when faced with challenging situations; 2. Reinforce that the uncomfortable feelings will pass.                                                                                                                                                                                                                                                                                                                                                                                                                                                                               |
| P* | Help to clarify outcome expectations                                              | ALLWHEEL manual - 1. review of goals                                                                                                                                                                                                                                                                                                                                                                                                                                                                                                                                                                                                                                                                                                                                                     |
| Q  | Determine PA skills & WC skills that are required (Enactive Mastery)              | 1. With the Research Coordinator (Emilie) and before the program starts, examine the areas for which people may need wheelchair skills training;                                                                                                                                                                                                                                                                                                                                                                                                                                                                                                                                                                                                                                         |

|           |                                                            |                                                                                                                                                                                                                                                  |
|-----------|------------------------------------------------------------|--------------------------------------------------------------------------------------------------------------------------------------------------------------------------------------------------------------------------------------------------|
|           |                                                            | 2. When a goal is set, think about what skills the participant may need to accomplish their goals;                                                                                                                                               |
| <b>R</b>  | Suggestions for skills training                            | 1. Provide suggestions that have worked for you in the past; 2. Discuss with Research Coordinators (Emilie & Krista) how this may be achieved.                                                                                                   |
| <b>S</b>  | Focus on past success                                      | 1. Have the participant describe previous successful experiences being physically active; 2. Get them to imagine what it would feel like today.                                                                                                  |
| <b>T</b>  | Verbal persuasion about past capabilities                  | 1. Encouraging and supportive words about 'you did this before, you can do it again', 2. Reinforce that missing a few days or even a couple of weeks is not a failure, and that being physically active is a lifestyle that will come with time. |
| <b>U</b>  | Share experiences of successes (vicarious experience)      | 1. Share stories of your successes, 2. And share stories about how you overcome challenges; 3. Share what is hard for you still today, and how you overcome it;                                                                                  |
| <b>V</b>  | Identify discrepancies between current behaviour and goals | 1. Evaluate goals and goal accomplishment. Identify areas where goals are not being met. Re-evaluate (or redefine) goals to help ensure the participant may achieve their goals.                                                                 |
| <b>W*</b> | Review PA goals                                            | ALLWHEEL manual - 1. review of goals                                                                                                                                                                                                             |
| <b>X</b>  | General and practical social support                       | 1. Support from you (the peer-trainer); 2. Support from family and friends; 3. Identify any community-based supports that may exist; 4. Encourage use of social media for support (if the participant is willing... but don't force it)          |
